# Supplementary material for: 17-oxo-DHA displays additive anti-inflammatory effects with fluticasone propionate and inhibits the NLRP3 inflammasome
Source: PubMed Central journal article supplement (PMC5121625; doi:10.1038/srep37625), 2016-11-24
Supplement: srep37625-s1.pdf [file srep37625-s1.pdf]

17-oxo-DHA displays additive anti-inflammatory effects with fluticasone propionate and inhibits the NLRP3 inflammasome.

*Chiara Cipollina, Serena Di Vincenzo, Liboria Siena, Caterina Di Sano, Mark Gjomarkaj and Elisabetta Pace.*

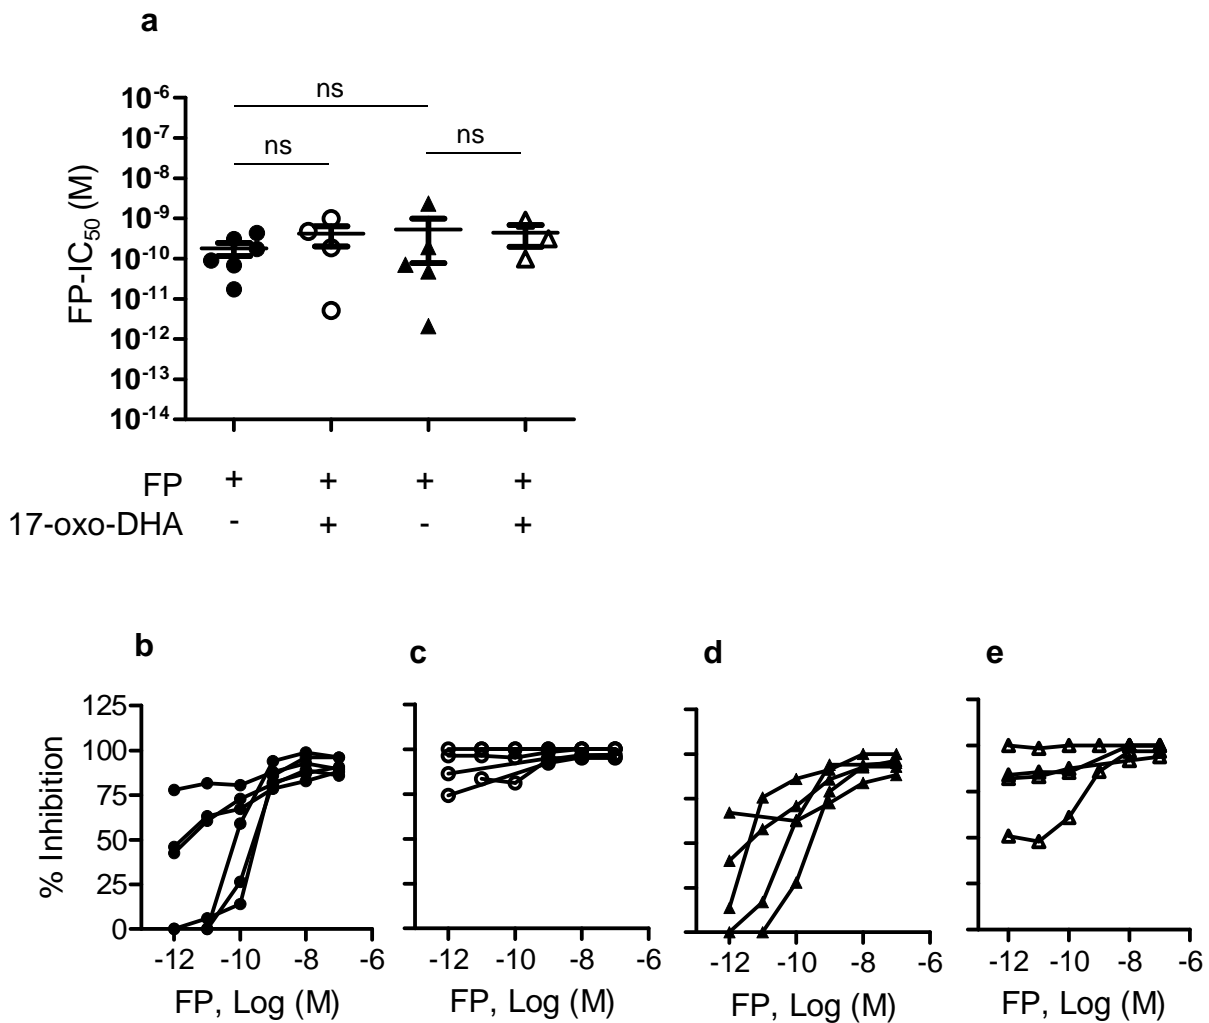

**Figure S1. Effect of 17-oxo-DHA on FP-IC<sub>50</sub> of LPS-induced TNF $\alpha$  release in PBMCs from COPD patients and healthy controls and individual dose-response curves.** PBMCs were treated with FP ( $10^{-12}$  to  $10^{-7}$  M) or a combination of FP and 5  $\mu$ M 17-oxo-DHA for 1h, and then stimulated with LPS for 18h. The levels of TNF $\alpha$  were measured in the supernatants by ELISA assay. **(a)** Individual values of IC<sub>50</sub> were calculated using the GraphPad software as the concentration of FP that produced 50% of the maximal inhibitory effect. In the samples where 17-oxo-DHA was added, it was not always possible to calculate IC<sub>50</sub>. In these specific cases, these values were not reported. **(b-e)** Individual dose-response curves that were used to calculate IC<sub>50</sub> values. ●, controls, FP; ○, controls, FP+17-oxo-DHA; ▲, COPD patients, FP; △, COPD patients, FP+17-oxo-DHA.

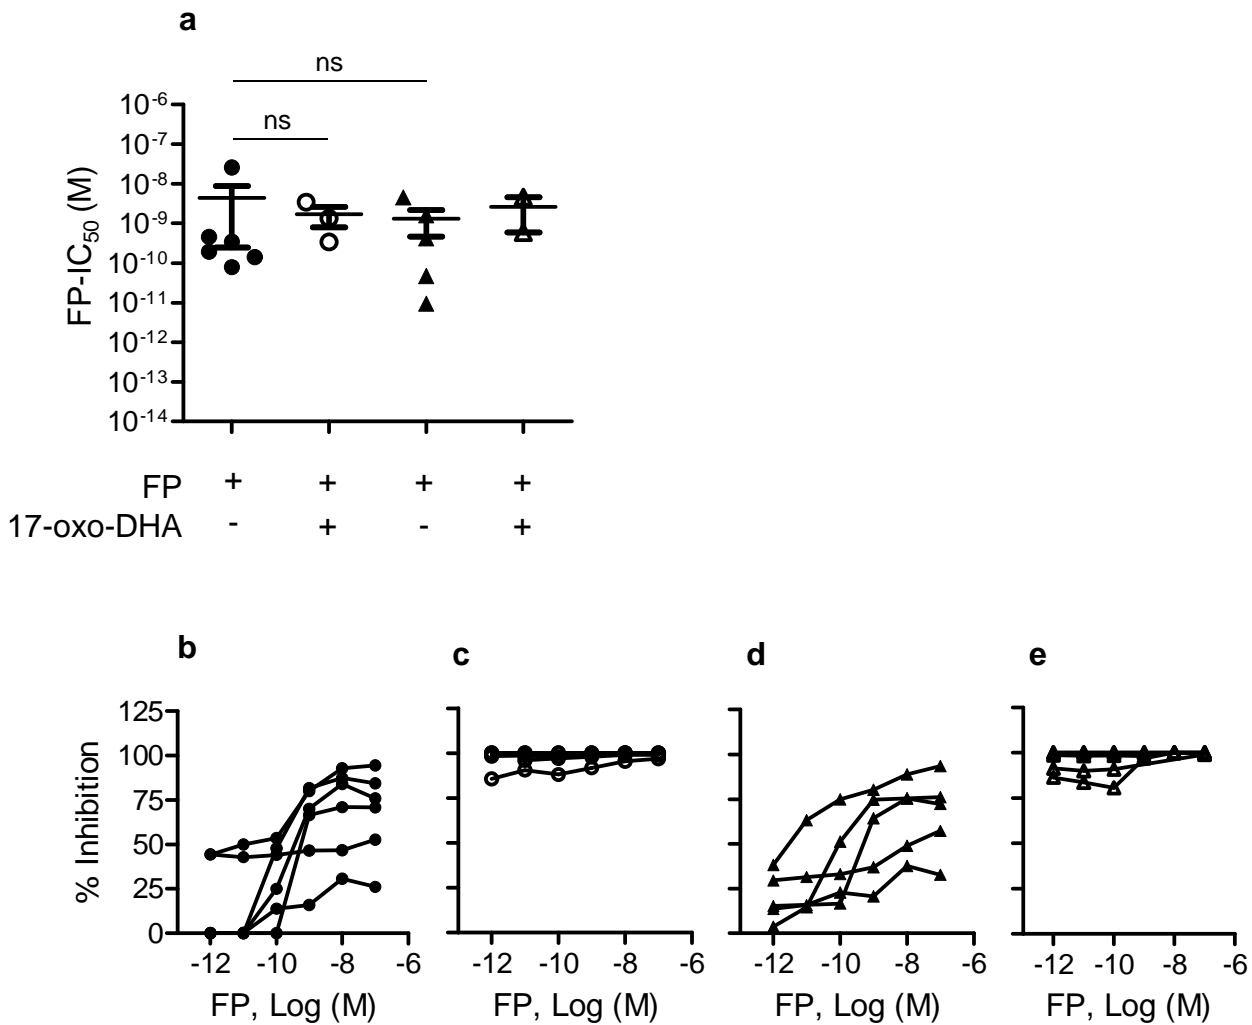

**Figure S2. Effect of 17-oxo-DHA on FP-IC<sub>50</sub> of LPS-induced IL-1 $\beta$  release in PBMCs from COPD patients and healthy controls and individual dose-response curves.** PBMCs were treated with FP ( $10^{-12}$  to  $10^{-7}$  M) or a combination of FP and 5  $\mu$ M 17-oxo-DHA for 1h, and then stimulated with LPS for 18h. The levels of IL-1 $\beta$  were measured in the supernatants by ELISA assay. **(a)** Individual values of IC<sub>50</sub> were calculated using the GraphPad software as the concentration of FP that produced 50% of the maximal inhibitory effect. In the samples where 17-oxo-DHA was added, it was not always possible to calculate IC<sub>50</sub>. In these specific cases, these values were not reported. **(b-e)** Individual dose-response curves that were used to calculate IC<sub>50</sub> values. ●, controls, FP; ○, controls, FP+17-oxo-DHA; ▲, COPD patients, FP; △, COPD patients, FP+17-oxo-DHA.

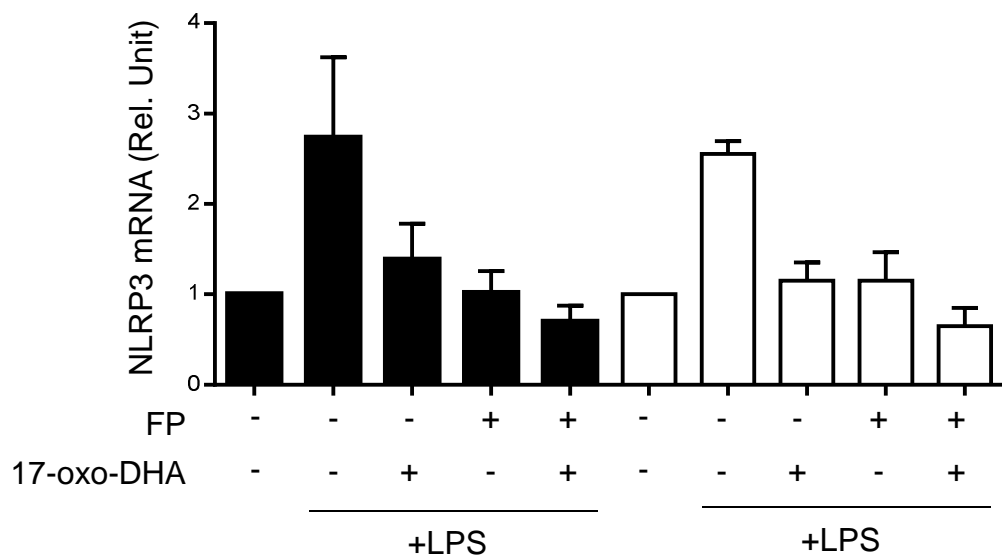

**Figure S3. Modulation of LPS-induced NLRP3 mRNA expression by 17-oxo-DHA and FP alone or in combination in PBMCs from COPD patients and healthy individuals.** PBMCs from COPD patients (empty bars, N=3) and healthy individuals (filled bars, N=3) were treated with 10 nM FP and 5  $\mu$ M 17-oxo-DHA, alone or in combination, for 1h then stimulated with 1 $\mu$ g/ml LPS for 4 h. Total RNA was extracted and NLRP3 mRNA levels measured by RT-PCR. Mean with SEM are reported.

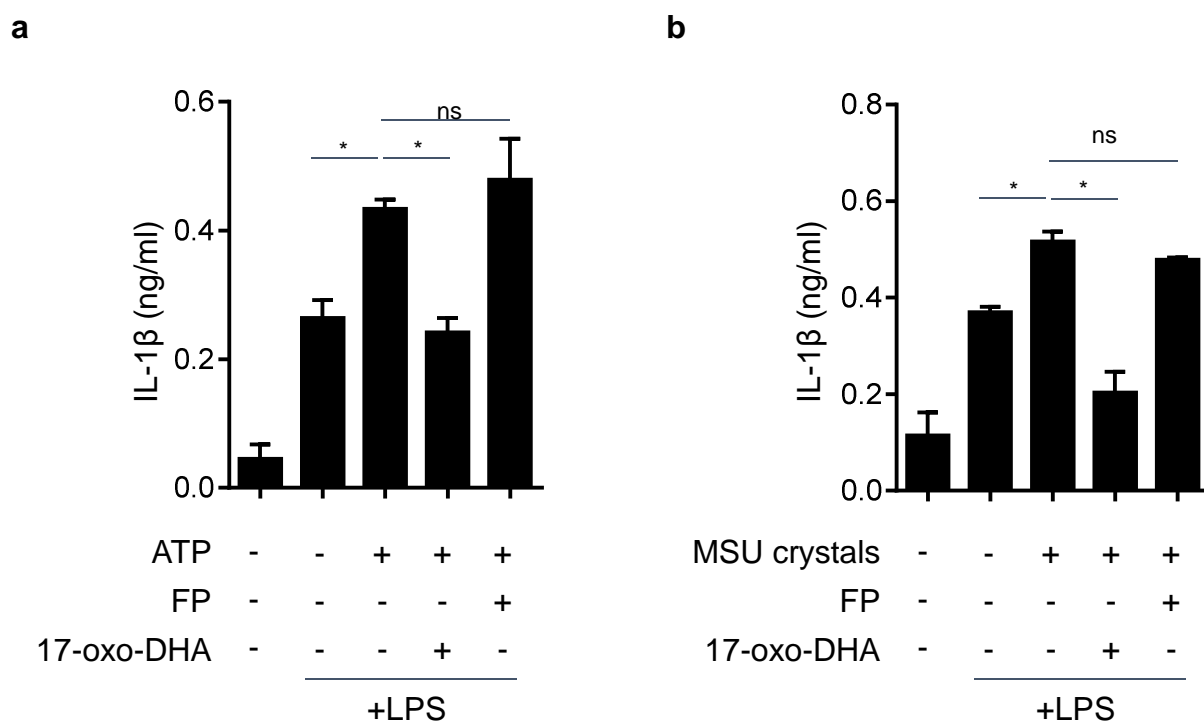

**Figure S4. Effect of 17-oxo-DHA on NLRP3 inflammasome activation by ATP and MSU crystals.** THP-1 cells were treated with 81 nM PMA for 48h then stimulated with 1  $\mu$ g/ml LPS for 3.5 h, followed by FP (10 nM) or 17-oxo-DHA (10  $\mu$ M) for 30 min then by 5 mM ATP for 30 min (a) or 150  $\mu$ g/ml MSU crystals for 1h (b) in serum-free medium. IL-1 $\beta$  was measured in the supernatants by ELISA assay. Mean with SEM are reported. \*, p-value <0.05; ns, p-value >0.05.

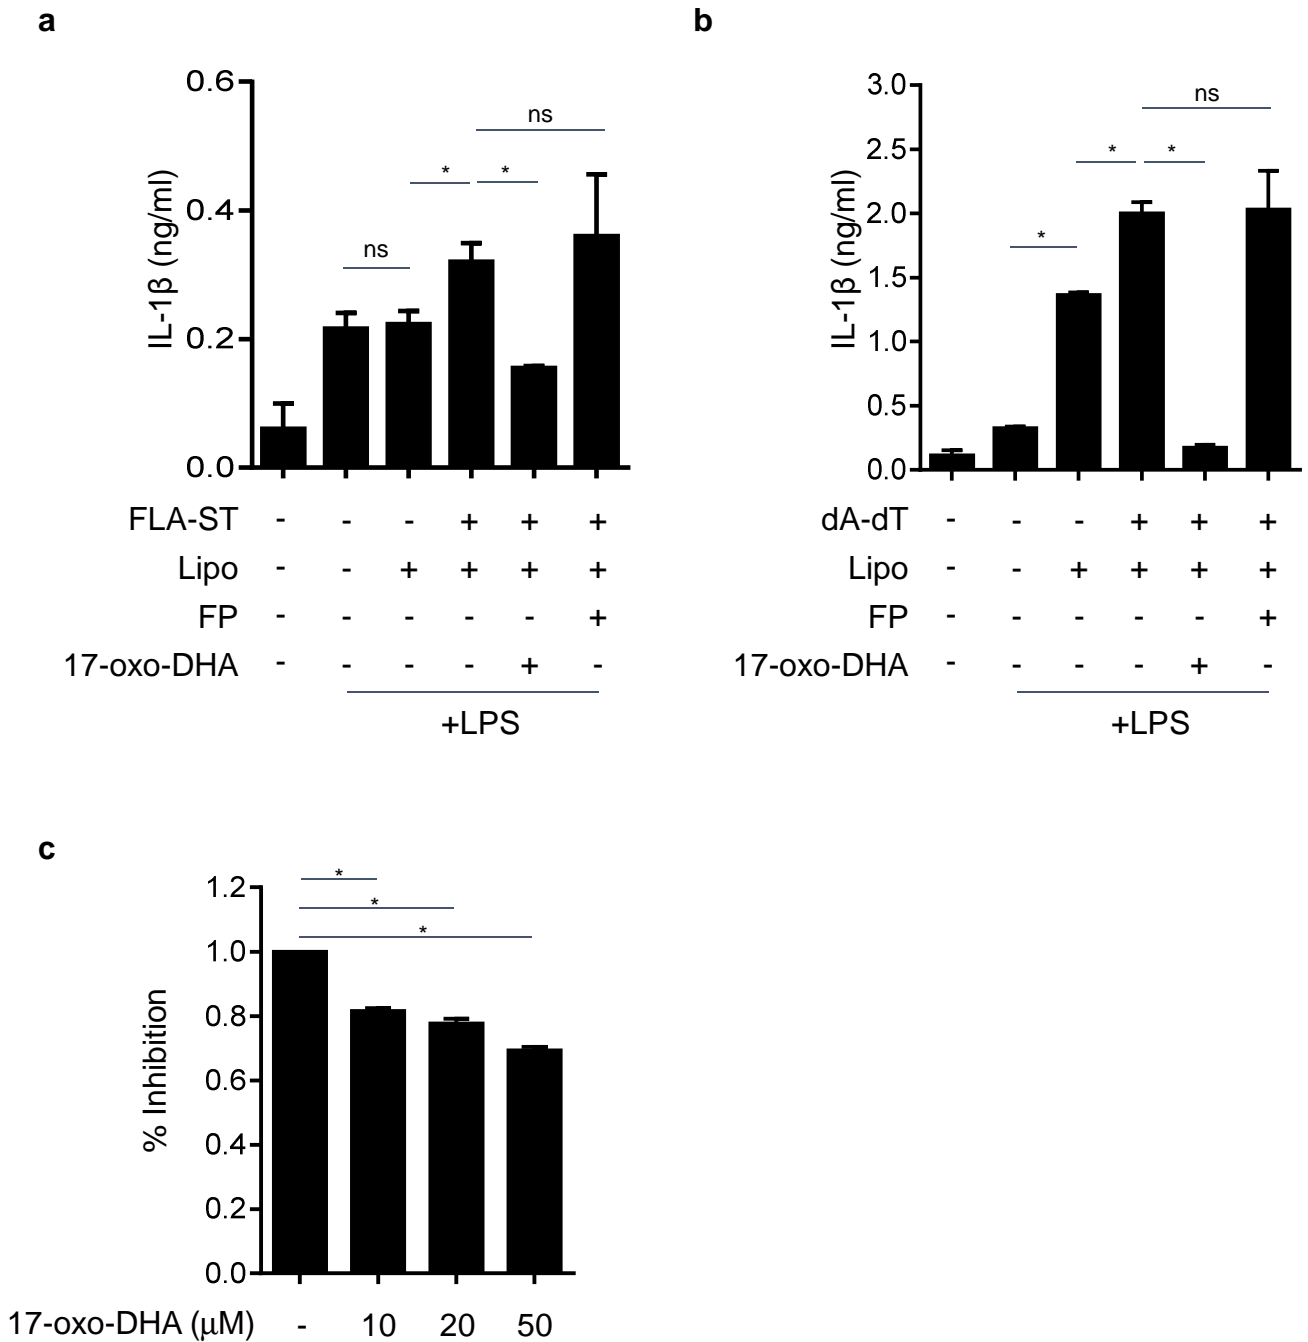

**Figure S5. Effect of 17-oxo-DHA on AIM2 and NLRC4 inflammasomes activation and on caspase-1 activity.** THP-1 cells were treated with 81 nM PMA for 48h then stimulated with 1  $\mu$ g/ml LPS for 3.5 h, followed by FP (10 nM) or 17-oxo-DHA (10  $\mu$ M) for 30 min then by 10  $\mu$ g/ml flagellin from *S. typhimurium* (FLA-ST) for 1h (a) or 1  $\mu$ g/ml dA-dT for 3h (b) in serum-free medium with lipofectamin 2000 (Lipo). IL-1 $\beta$  was measured in the supernatants by ELISA assay. (c) % Inhibition of caspase-1 activity by 17-oxo-DHA measured with an endpoint colorimetric enzymatic assay after 2 h. Mean with SEM are reported. \*, p-value <0.05; ns, p-value >0.05.

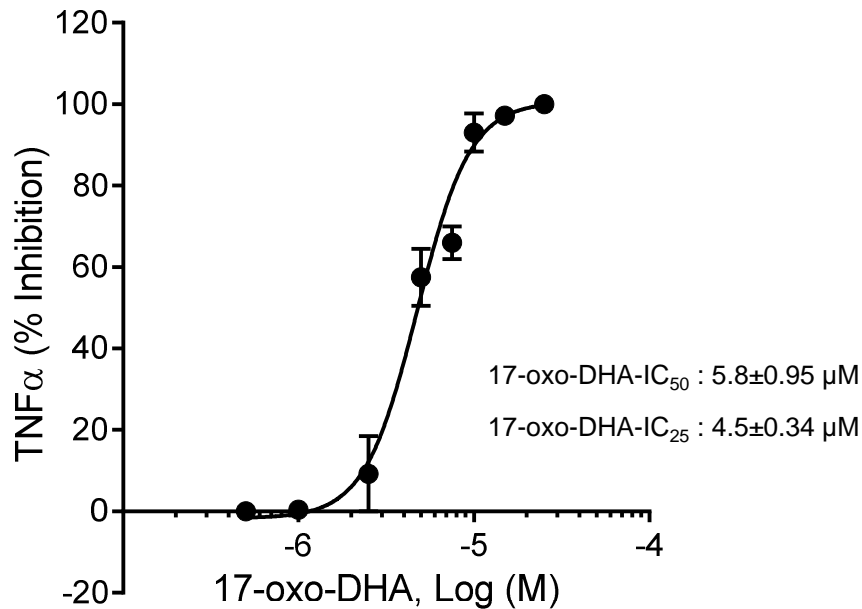

**Figure S6. Effect of increasing doses of 17-oxo-DHA on TNFα inhibition.** PBMCs isolated from healthy subjects were treated with increasing concentration of 17-oxo-DHA alone for 1h, then stimulated with 1 μg/ml LPS for 18h. The levels of TNFα were measured in the supernatants by ELISA assay. IC<sub>50</sub> and IC<sub>25</sub> values were calculated using the GraphPad software as the concentrations of 17-oxo-DHA that produced 50% and 25% of the maximal inhibitory effect, respectively. Data are reported as mean with SEM of 3 independent experiments.

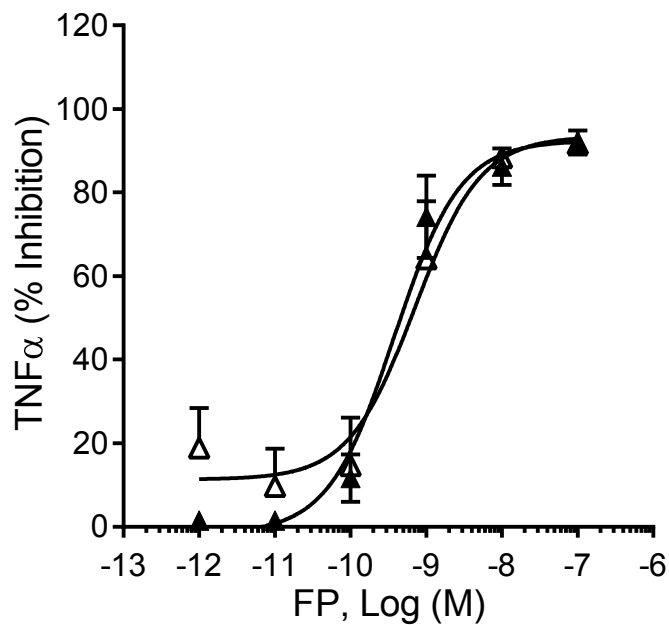

**Figure S7. Effect of increasing doses of FP alone or in combination with 2.5 μM 17-oxo-DHA on TNFα inhibition.** PBMCs isolated from healthy subjects were treated with increasing concentrations of FP alone (▲) or in the presence of 2.5 μM 17-oxo-DHA (△) for 1h, and then stimulated with LPS for 18h. The levels of TNFα were measured in the supernatants by ELISA assay. Data are reported as mean with SEM of 4 independent experiments (FP alone) or 3 independent experiments (FP+17-oxo-DHA).
